# Supplementary material for: "Living in Hell": Experiences of Iranian Families Living with Patients with Schizophrenia
Source: Research Square preprint supplement (doi:10.21203/rs.3.rs-644478/v1), 2021-08-02
Supplement: Supplementary file 1 [file d17f7eea6899aee17a13f13a.docx]

Table 2: Experiences of Families of Iranian Patients with Schizophrenia

| Main theme | Themes | Subthemes |
| --- | --- | --- |
| Living in hell | Public unawareness | Public unawareness  Lack of proper marriage opportunities  Belief that the disease is inherited |
| Stigma | Discrimination  To be ridiculed  reproach |
| Sense of shame | Hiding the disease  Fear of superimposition |
| Isolation | Fear of people  Lack of freedom in communication |
| Poor quality of life | Loss of family security  Sorrow  Academic failure  Turmoil in the family |
| Need of support | Financial problems  Burden of care  Need to support |
