# Supplementary material for: "Living in Hell": Experiences of Iranian Families Living with Patients with Schizophrenia
Source: Research Square preprint supplement (doi:10.21203/rs.3.rs-644478/v1), 2021-08-02
Supplement: Supplementary file 2 [file 72c5a57c46dca967e9897c19.docx]

Demographic characteristics of participants

| Participant no | Relation to patient | Time from diagnosed with schizophrenia (years) | age | Level of education | occupation |
| --- | --- | --- | --- | --- | --- |
| 1 | Daughter | 8 | 22 | Diploma | Housekeeper |
| 2 | Spouse | 6 | 35 | k-9 | Housekeeper |
| 3 | Sister | 10 | 42 | Diploma | Hand crafter |
| 4 | Sister | 5 | 32 | Diploma | Housekeeper |
| 5 | Mother | 6 | 45 | Illiterate | Housekeeper |
| 6 | Son | 8 | 22 | Diploma | Bread cooker |
| 7 | Daughter | 6 | 18 | k-9 | Student |
| 8 | Mother | 3 | 55 | Illiterate | Housekeeper |
| 9 | Mother | 4 | 45 | Diploma | Housekeeper |
| 10 | Nephew | 10 | 25 | Bachelor | Merchant |
| 11 | Mother | 4 | 47 | Diploma | Housekeeper |
| 12 | Son | 8 | 24 | k-10 | Freelancer |
| 13 | Spouse | 4 | 35 | k-9 | Hand crafter |
| 14 | Mother | 4 | 52 | k-9 | Housekeeper |
| 15 | Spouse | 10 | 48 | Elementary school | Hand crafter |
| 16 | Mother | 7 | 35 | Associate degree | Teacher |
| 17 | Father | 8 | 57 | Junior school | Merchant |
| 18 | Spouse | 5 | 43 | Bachelor | Employee |
| 19 | Brother | 3 | 22 | Junior school | Farmer |
| 20 | Mother | 8 | 50 | Illiterate | Housekeeper |
