# Supplementary material for: "Living in Hell": Experiences of Iranian Families Living with Patients with Schizophrenia
Source: Research Square preprint supplement (doi:10.21203/rs.3.rs-644478/v1), 2021-08-02
Supplement: Supplementary file 4 [file 6bb46808d6a802768cfef1a7.docx]

**Title: “Living in Hell”: Experiences of Iranian families Living with Patients with Schizophrenia**

Running title: Living in hell

Word count: 3456

**Authors:**

**Parviz Molavi**

MD, associate professor, Department of Psychiatry, Ardabil University of Medical Sciences, Ardabil, Iran

**Saeed Sadeghie-Ahary**

Ph.D.Associate professor, department of Community Health, Ardabil University of Medical Sciences, Ardabil, Iran.[s.sadeghieh@arums.ac.ir](mailto:s.sadeghieh@arums.ac.ir)

**Mohsen Rezaeian**

Ph.D. Professor, Epidemiology and Biostatistics Department, Rafsanjan Medical School, Rafsanjan University of Medical Sciences, Rafsanjan, Iran. [moeygmr2@yahoo.co.uk](mailto:moeygmr2@yahoo.co.uk)

**Elmira Taghizadeh**

MD, school of medicine, Ardabil University of Medical Sciences, Ardabil, Iran.[taghizadeh.elmira@gmail.com](mailto:taghizadeh.elmira@gmail.com)

**Elhameh Nasiri**

Msn, school of Nursing and Midwifery, Ardabil University of Medical Sciences, Ardabil, Iran. [E.nasiri@arums.ac.ir](mailto:E.nasiri@arums.ac.ir)

**Mansoureh Karimollahi***

Ph.D., Associate professor, School of Nursing and Midwifery, Ardabil University of Medical Sciences, Ardabil, Iran

* Corresponding author: email: [karimollahi@gmail.com](mailto:karimollahi@gmail.com)

phone: +989143530790

Postal address: School of Nursing and Midwifery, Shohada headway, Ardabil, Iran.

Conflict of interest: the authors declare that there is no conflict of interest.

Ethics: the project is accepted by the ethics committee of Ardabil University of medical sciences, and informed consent was taken from all participants in this study.
